# Supplementary material for: Evidence for Microchimerism in Baboon Recipients of Pig Hearts
Source: MDPI journal article supplement (doi:10.3390/v15071618), 2023-07-24
Supplement: s1 [file s1]

**Table S1.** Determination of the effective annealing temperature and sensitivity of the PCR detecting PERVpol sequences using a gene block

| Annealing Temperature           | 60 Degrees |       | 62 Degrees |
|---------------------------------|------------|-------|------------|
| 58 Degrees gBlock III Dilutions |            |       |            |
| 10 <sup>0</sup>                 | N.d.       | N.d.  | N.d.       |
| 10 <sup>1</sup>                 | N.d.       | N.d.  | 37.03      |
| 10 <sup>2</sup>                 | 36.46      | 33.58 | 36.07      |
| 10 <sup>3</sup>                 | 31.36      | 30.67 | 29.89      |
| 10 <sup>4</sup>                 | 24.19      | 24.61 | 23.54      |
| 10 <sup>5</sup>                 | 19.27      | 19.35 | 19.69      |

N.D., not detected

## Supplementary Figure 1

---

|                                                                        |     |     |     |     |     |     |     |
|------------------------------------------------------------------------|-----|-----|-----|-----|-----|-----|-----|
| 1                                                                      | 10  | 20  | 30  | 40  | 50  | 60  | 70  |
| AGGGAGTTCCCATCGTGGCTCAGTGGTAACGAACCTGACTAGTATCCATGAGGATGCAGATTCAATCCCT |     |     |     |     |     |     |     |
| GACTAGGAACCATGAGGTTGCGTTTGATCCCT                                       |     |     |     |     |     |     |     |
| 71                                                                     | 80  | 90  | 100 | 110 | 120 | 130 | 140 |
| GGCCTTNCTCAGTCGGTTAAGGATCCNGCATTGCTGTGAGNTGTGGTGTAGGTCNCAGATGCGGCTCGGA |     |     |     |     |     |     |     |
| GGCCTTGCTCAGTGG                                                        |     |     |     |     |     |     |     |
| 141                                                                    | 150 | 160 | 170 | 180 | 190 | 200 | 210 |
| TCCCGTGTGCTGTGGCTGTGGTGTAGGC                                           |     |     |     |     |     |     |     |
| GGCAGCTACAGCTCCGATTNGACCCCTAGCCTGGGAACCT                               |     |     |     |     |     |     |     |
| GACACCGACACCACATCCGA                                                   |     |     |     |     |     |     |     |
| 211                                                                    | 220 | 230 |     |     |     |     |     |
| CCATATGCCGCGGGTGNGGCCCT                                                |     |     |     |     |     |     |     |

---

Forward Primer GACTAGGAACCATGAGGTTGCG

Reverse Primer AGCCTACACCACAGCCACAG

Probe TTTGATCCCTGGCCTTGCTCAGTGG
